1 **AtPQT11, a P450 enzyme, detoxifies paraquat via N-demethylation**

2 Yi-Jie Huang<sup>1</sup>, Yue-Ping Huang<sup>1,2</sup>, Jin-Qiu Xia<sup>1</sup>, Zhou-Ping Fu<sup>3</sup>, Yi-Fan Chen<sup>3</sup>,  
3 Yi-Peng Huang<sup>3</sup>, Aimin Ma<sup>4</sup>, Wen-Tao Hou<sup>1</sup>, Yu-Xing Chen<sup>1</sup>, Xiaoquan Qi<sup>4</sup>, Li-Ping  
4 Gao<sup>3</sup>, Cheng-Bin Xiang<sup>1</sup>

5

6 <sup>1</sup>School of Life Sciences, Division of Molecular & Cell Biophysics, Hefei National  
7 Science Center for Physical Sciences at the Microscale, University of Science and  
8 Technology of China, The Innovation Academy of Seed Design, Chinese Academy of  
9 Sciences, Hefei, Anhui Province 230027, China

10 <sup>2</sup>School of Life Sciences, Sun Yat Sen University, No. 135, Xingang Xi Road,  
11 Guangzhou, 510275, P. R. China

12 <sup>3</sup>School of Life Science, Anhui Agricultural University, 130 West Changjiang Rd,  
13 Hefei 230036, Anhui, China

14 <sup>4</sup> **Key Laboratory of Plant Molecular Physiology**, Institute of Botany, The Innovation  
15 Academy of Seed Design, Chinese Academy of Sciences, Beijing, China

16

17 Correspondence:

18 Cheng-Bin Xiang

19 Email: [xiangcb@ustc.edu.cn](mailto:xiangcb@ustc.edu.cn)

20 [orcid.org/0000-0002-7152-1458](https://orcid.org/0000-0002-7152-1458)

21

22 Li-Ping Gao

23 E-mail: [gaolp62@126.com](mailto:gaolp62@126.com)

24

25 **Abstract**

26 Paraquat is one of the most widely used nonselective herbicides in agriculture.  
27 Due to its wide use, paraquat resistant weeds have emerged and is becoming a  
28 potential threat to agriculture. The molecular mechanisms of paraquat resistance in  
29 weeds remain largely unknown. Physiological studies indicated that the impaired  
30 translocation of paraquat and enhanced antioxidation could improve paraquat  
31 resistance in plants. However, the detoxification of paraquat via active metabolism by  
32 plants has not been reported to date. Here we report that an activated expression of  
33 *At1g01600* encoding the P450 protein CYP86A4 confers paraquat resistance as  
34 revealed by the gain-of-function mutant *paraquat tolerance 11D* (*pqt11D*), in which a  
35 T-DNA with four 35S enhancers was inserted at 1646 bp upstream the ATG of  
36 *At1g01600*. The paraquat resistance can be recapitulated in Arabidopsis wild type by  
37 overexpressing *AtPQT11* (*At1g01600*), while its knockout mutant is hypersensitive to  
38 paraquat. Moreover, *AtPQT11* also confers paraquat resistance in *E. coli* when  
39 overexpressed. We further demonstrate that AtPQT11 has P450 enzyme activity that  
40 converts paraquat to N-demethyl paraquat nontoxic to Arabidopsis, therefore  
41 detoxifying paraquat in plants. Taken together, our results unequivocally demonstrate  
42 that AtPQT11/ CYP86A4 detoxifies paraquat via active metabolism, thus revealing a  
43 novel molecular mechanism of paraquat resistance in plants and providing a means  
44 potentially enabling crops to resist paraquat.

45

46 **Key words:** paraquat, paraquat resistance, *AtPQT11*, *pqt11*, CYP86A4, P450,  
47 herbicide, demethylation.

48

49

---

## 50 Introduction

51 Paraquat (1,1'-dimethyl-4,4'-bipyridinium dichloride) has been widely used as  
52 a broad spectrum nonselective herbicide in agriculture for decades<sup>1</sup>. Plants absorb  
53 paraquat from their environment and transport to chloroplasts, where it competes for  
54 electrons on the PSI and generates superoxide that is converted to H<sub>2</sub>O<sub>2</sub> by superoxide  
55 dismutases (SODs), resultantly accumulating a large amount of ROS, which may lead  
56 to cell death<sup>2</sup>.

57 Paraquat resistant weeds have emerged after the wide use of paraquat in  
58 agriculture. The underlying mechanisms of paraquat resistance in weeds have been  
59 studied mostly at physiological and biochemical levels<sup>3-6</sup>. From these studies, two  
60 major mechanisms of paraquat resistance were suggested, including defects in  
61 paraquat translocation restricting the transport of paraquat to chloroplasts<sup>4,7</sup>, and  
62 enhanced antioxidation scavenging ROS more efficiently<sup>8,9</sup>. However, no genetic or  
63 molecular evidence for the proposed mechanisms has been revealed in weeds. With  
64 the power of the model plant *Arabidopsis*, several research groups have isolated  
65 paraquat resistant mutants, originally aiming at identifying novel components in  
66 oxidative stress response or cell death<sup>10,11</sup>. These studies with *Arabidopsis* paraquat  
67 resistant mutants helped reveal the molecular mechanisms of paraquat resistance  
68 proposed by weed scientists based on their studies on paraquat resistant weeds. The  
69 unraveled molecular mechanisms from these studies fall into two categories; one  
70 involves paraquat uptake and transport<sup>12-15</sup>, and the other is the enhanced ability  
71 scavenging ROS<sup>10,11,16,17</sup>.

72 However, no evidence of paraquat degradation by plant active metabolism has  
73 been reported. Herbicide degradation by plants via active metabolism is a desirable  
74 mechanism for engineering crop resistance to herbicides. CYP450s (cytochrome  
75 P450s) constitute the biggest plant protein family and can mediate redox reaction in  
76 plant. They usually function as demethylase and/or hydroxylase in herbicide  
77 metabolism<sup>18</sup>. Some P450s metabolize herbicides to lower toxic products which are  
78 transferred to vacuole as glucosyl conjugates<sup>19</sup>. Two plant cytochrome P450 enzymes,

79 CYP71A10 from *Helianthus tuberosus* and CYP76B1 from soybean, were reported  
80 having urea herbicide metabolism activity<sup>20</sup>. In addition, tobacco CYP81B2 and  
81 CYP71A11 catabolize chlortoluron by ring methyl hydroxylation and N-methylation  
82 <sup>21</sup>.

83 We previously isolated a number of paraquat tolerant Arabidopsis mutants and  
84 reported *pqt24* and *pqt3*<sup>15,16</sup>. Here we continue to characterize those paraquat  
85 tolerance mutants by focusing on *pqt11D* in this study. We isolated *pqt11D* as a  
86 gain-of-function mutant with enhanced paraquat tolerance and identified that the  
87 *At1G01600* (*AtPQT11*) was activated by the enhancers of the T-DNA insertion, which  
88 caused paraquat resistance in the mutant. The mutant phenotype could be  
89 recapitulated by overexpressing *AtPQT11*, encoding the protein CYP86A4, a member  
90 of CYP450 super family, in the wild type Arabidopsis. Further analyses revealed that  
91 AtPQT11/CYP86A4 could convert paraquat to N-demethyl paraquat *in vitro* by the  
92 mean of N-demethylation, and demethylated paraquat was found nontoxic to  
93 Arabidopsis, clearly demonstrating paraquat degradation by a plant P450 enzyme. Our  
94 study revealed a novel molecular mechanism of paraquat resistance that has not been  
95 reported in plants. Our findings should provide a new means for developing paraquat  
96 resistance crops using *AtPQT11/CYP86A4*.

97

## 98 **Result**

99

### 100 **Activated expression of *At1G01600* confers paraquat resistance in *pqt11D***

101 From an Arabidopsis activation-tagging library of approximately 55000 lines, we  
102 isolated a number of paraquat tolerance mutants. One of them, *pqt11D*, displayed  
103 enhanced resistance to paraquat (Fig. S1A). We found that the T-DNA with four 35S  
104 enhancers next to the right border was inserted at 1646 bp upstream the ATG codon of  
105 *At1g01600* (Fig. S1B). As a result, the gene *At1g01600* was activated (Fig. S1C),  
106 indicating that the activated expression of *At1g01600* may be responsible for observed  
107 paraquat resistance in *pqt11D*. We therefore named *At1g01600* as *AtPQT11*.

108 *AtPQT11* is predicted to encode CYP86A4, a cytochrome P450 enzyme with 554  
109 amino acids. It is expressed in all tissues examined with relatively higher levels in  
110 roots, flowers and siliques (Fig. S1D), and induced by paraquat treatment for the first  
111 3 hours, then declined (Fig. 1E).

112 **The *pqt11D* phenotype can be recapitulated by overexpressing *AtPQT11* in the**  
113 **wild type**

114 To confirm whether the paraquat resistance of *pqt11D* was caused by an activated  
115 expression of *AtPQT11*, we generated two *AtPQT11* overexpression lines (OX1-4 and  
116 OX3-1) and obtained a knockout mutant *pqt11* (Salk\_073078), in which the T-DNA  
117 was inserted in the first exon of *AtPQT11* from ABRC (Fig. S1B), and confirmed all  
118 the genetic materials by 3-primers PCR (Fig. S1F) and qRT-PCR analyses (Fig. S1G).

119 Seed germination assay in response to paraquat treatment showed that two OX  
120 lines had significantly higher survival after 7 days on MS medium with 2  $\mu$ M  
121 paraquat compared with the wild type, while the knockout mutant *pqt11* became  
122 hypersensitive (Fig. 1A and B).

123 We also conducted paraquat resistance assay on soil-grown plants of different  
124 *AtPQT11* genotypes. When the plants grew to the stage with 8 rosette leaves, they  
125 were sprayed with 10  $\mu$ M paraquat every 3 days. 10 days after the first spray, The OX  
126 lines showed a significantly higher survival than wild type control, whereas the  
127 knockout mutant exhibited sicker phenotype and lower survival (Fig. 1C and D).

128 Together, these results demonstrate that an elevated expression of *AtPQT11*  
129 confers paraquat resistance in Arabidopsis.

130 ***AtPQT11* renders *E. coli* resistant to paraquat**

131 To further confirm *AtPQT11*-conferred paraquat resistance, we cloned *AtPQT11*  
132 cDNA into pET28a vector (pET28a-P450) and expressed in *E. coli*. Based on 3-D  
133 simulation of AtPQT11 structure (Fig. S2), we created single mutations of three  
134 residues G309A, S461A, G463A around the predicted substrate binding pocket and  
135 further expressed these three mutants in *E. coli*, respectively. In the absence of  
136 paraquat in liquid culture medium, there was no difference was observed between the  
137 bacteria expressing pET28a-P450 and the empty pET28a. In contrast, the bacteria

138 expressing pET28a-P450 displayed a remarkable resistance to 1 mM paraquat than  
139 those harboring the empty pET28a, whereas the bacteria transformed with the  
140 constructs carrying 3 different point mutations in *AtPQT11* exhibited no paraquat  
141 resistance as the empty vector control (Fig. 1E). When grown on solid agar medium  
142 containing 1 mM paraquat, only bacteria expressing pET28a-P450 formed colony  
143 plaques (Fig. 1F). These results further confirm the role of *AtPQT11* in paraquat  
144 resistance and indicate that the amino acid residues are critical for its function.

145 ***AtPQT11* catalyzes the conversion of paraquat to N-demethyl paraquat *in vitro***

146 Considering that *AtPQT11* encodes a P450 protein, we reasoned *AtPQT11* might  
147 catabolize paraquat to a nontoxic product. To demonstrate this, we first established an  
148 *in vitro* enzyme assay using *E. coli* expressed *AtPQT11* protein, paraquat as substrate,  
149 and NADPH as electron donor as described in Materials and Methods. The  
150 consumption of NADPH provides a convenient spectrophotometric monitor at  
151 OD<sub>340nm</sub> of the reaction. As shown in Fig. 2A, the consumption of NADPH was  
152 *AtPQT11*-dependent in the reaction and increased with incubation time. Therefore, we  
153 established the *in vitro* enzyme assay for *AtPQT11* and used this assay to determine  
154 the enzyme kinetic properties (Fig. 2B-D).

155 To identify the product of the reaction, the paraquat metabolite of the *in vitro*  
156 reaction was analyzed by LC-MS/MS. A product peak was found at 2.7 min with m/z  
157 171, which was *AtPQT11*- and NADPH-dependent (Fig. 3A-D, left panels). To  
158 confirm that this product is derived from paraquat, we used the <sup>2</sup>H-labeled paraquat as  
159 the substrate, whose eight hydrogen atoms on paraquat pyridine ring were replaced by  
160 deuterium so that the m/z of paraquat changed from 186 to 194. As expected, we  
161 found the product peak with m/z 179, which was also *AtPQT11*- and  
162 NADPH-dependent (Fig. 3A-D, right panels). The reaction product has the same  
163 mass as N-demethyl paraquat (m/z 171).

164 To resolve the identity of the product, we analyzed the MS/MS spectrum and  
165 found that the product showed the same fragment ions as N-demethyl paraquat  
166 standard (Fig. 3F, left panel and G, right panel), which was further confirmed by the  
167 same experiments with <sup>2</sup>H-labeled paraquat (Fig. 3E and F, right panels). These

168 results unequivocally show that the product is derived from the substrate and the  
169 product matches N-demethyl paraquat based on their fragment ion pattern (Fig. 3G).  
170 Thus, we have demonstrated that AtPQT11/ CYP86A4 functions as an N-demethylase  
171 capable of converting paraquat to N-demethyl paraquat.

### 172 **N-demethyl paraquat is nontoxic to Arabidopsis**

173 Have identified N-demethyl paraquat as the product, we decided to find out  
174 whether N-demethyl paraquat has herbicide activity. To demonstrate this, we simply  
175 tested whether the N-demethyl paraquat is toxic to Arabidopsis. Seed germination  
176 assay in the presence of N-demethyl paraquat showed that two OX lines, WT and  
177 knockout mutant *pqt11* all survived and grew well on MS medium with 2  $\mu$ M  
178 N-demethyl paraquat or 2  $\mu$ M bipyridine (double demethylated paraquat) compared  
179 with paraquat (Fig. 4A and B). This result clear shows that N-demethyl paraquat and  
180 bipyridine are nontoxic to Arabidopsis. Therefore, we have uncovered the molecular  
181 mechanism underlying the paraquat resistance of *pqt11D*.

182

### 183 **Discussion**

184 In this study we reported the paraquat resistance mutant *pqt11D* and the  
185 underlying molecular mechanism. The phenotype of the mutant was caused by an  
186 activated expression of *AtPQT11*, which was confirmed by recapitulation analyses in  
187 Arabidopsis wild type as well as in *E. coli* (Fig. 1 and Fig. S1A-C). The paraquat  
188 hypersensitive phenotype of the *AtPQT11* knockout mutant also supports that  
189 *AtPQT11* is responsible for the observed paraquat resistance (Fig. 1 and 4). Further  
190 analyses revealed the AtPQT11 catalyzed biochemical reaction converting paraquat to  
191 single demethylated product (Fig. 2 and 3), and we also found that N-demethyl  
192 paraquat is nontoxic to Arabidopsis (Fig. 4).

193 CYP450 enzymes is widely found in biosynthesis or catabolic processes  
194 through the whole life in all living organisms<sup>22</sup>. Several members of CYP450 family  
195 have been reported to detoxify herbicides<sup>23,24</sup>. As a xenobiotic, paraquat is not a  
196 natural substrate of the CYP450 enzyme AtPQT11. The natural substrates of

197 AtPQT11 remain unknown at present. AtPQT11 can catalyze the conversion of  
198 paraquat to N-demethyl paraquat perhaps because paraquat may have similar  
199 structural resemblance to its natural substrates.

200       Since paraquat is a widely used herbicide in agriculture, paraquat resistant weeds  
201 have emerged, which is a potential threat to agriculture. Generally, plants could gain  
202 paraquat resistance in three ways. First, paraquat absorption and transport are limited,  
203 thus preventing paraquat from reaching chloroplasts. Second, an enhanced  
204 intracellular antioxidant capacity would help plants to scavenge ROS more efficiently.  
205 Third, paraquat may be degraded to nontoxic metabolites. Plants may have these  
206 strategies in single or in combination to produce paraquat resistance<sup>25</sup>. There are  
207 many reports for the first two strategies<sup>4,10,13,15,16</sup>. However, paraquat degradation by  
208 plants has not been reported thus far. Our finding with *pqt11D* fills up the gap for the  
209 third strategy.

210       In conclusion, our findings with the paraquat resistant mutant *pqt11D*  
211 unequivocally demonstrate that AtPQT11, a member of the P450 super family  
212 detoxifies paraquat and confers paraquat resistance in Arabidopsis when  
213 overexpressed, therefore providing a much needed means to engineering paraquat  
214 resistance crops.

215

## 216 **Methods and materials**

217

### 218 **Plant material and growth conditions**

219       Arabidopsis Col-0 was used as wild type in this study. We also used Col-0 as the  
220 genetic background for all the mutants and transgenic plants. Salk\_073078 was  
221 ordered from the Arabidopsis Biological Resource Center (ABRC). Seeds were  
222 sterilized in 10% bleach for 10 minutes and washed with sterile water 5 times. The  
223 washed seeds were kept in the dark at 4°C for 2 days before germination on MS  
224 medium at 22°C under 14 h light/10 h dark.



---

## 225 **Construction of *AtPQT11* overexpression lines**

226 In order to get overexpression lines, we used forward primer

227 5'-GGGGACAAGTTTGTACAAAAAAGCAGGCT

228 ATGGAAATATCCAATGCCATGC-3 and reverse primer

229 5'-GGGGACCACTTTGTACAAGAAAGCTGGGT

230 TTAAACCACTGCAACTCCCGTA-3' to obtain the CDS of CYP86A4. By means of

231 GATEWAY system<sup>26</sup>, the CDS was cloned into vector pCB2004 via the shuttle vector

232 of pDONR207.

233 The constructed plasmid was transformed into *Agrobacterium tumefaciens*

234 C58C1 by electroporation. The floral-dip method was used to transfer the construct

235 into plants<sup>27</sup>. The positive lines were screened as glufosinate resistant plants and

236 homozygous lines were obtained from F2 population.

## 237 **RNA extraction and qRT-PCR**

238 We extracted the RNA from one-week-old seedlings by Trizol (Invitrogen,

239 Carlsbad, California, USA) and reverse transcribed RNA to cDNA by TransScript Kit

240 (TaKaRa). The expression of CYP86A4 was detected by RT-PCR or quantitative

241 RT-PCR using forward primer 5'-CCCCAAGGGTTTCACTGAATTC-3' and reverse

242 primer 5'-AAGTAAATGCGAAGCCTGCTTG -3' and Applied Biosystem Step One

243 real-time PCR system or TaKaRa SYBR Premix Ex Taq II reagent kit. *UBQ5* was

244 used as the internal reference.

## 245 **Identification of the *AtPQT11* knockout mutant**

246 3 primers including forward primer 5' - TTCACCACATACAGCTGCATC -3',

247 reverse primer 5' - AAATGTTGTCGAATGTGAGCC-3' and intermediate primer

248 Lb1.3 5'-ATTTTGCCGATTCGGAAC-3' were used to identify homozygotes of

249 SALK\_073078. The homozygotes showed only one band around 750 bp while the

250 wild type showed one band around 1000 bp. RT-PCR was performed to confirm null

251 expression of the *Atlg01600* in SALK\_073078 by using forward primer 5'-

252 ATGGAAATATCCAATGCCATGC-3' and reverse primer 5'-

253 TTAAACCACTGCAACTCCCGTA-3'. *TUBULIN* was used as the internal control.

---

254 **Seed germination assay**

255 Sterilized seeds for each line including WT, knock out mutant SALK\_073078  
256 (*pqt11/cyp86a4*) and two overexpression lines OX1-4 and OX3-1 were treated at 4°C  
257 in dark condition for 2 days. Then we put these seeds on MS medium with 2 μM  
258 paraquat, MS medium was used as control. The plates were placed at 22°C under 14  
259 h light/10 h dark cycles. We considered the appearance of two green cotyledons as  
260 successful germination, 1 week later we recorded germination %.

261 **Paraquat resistance assay on soil-grown plants**

262 One-week-old seedlings grown on MS medium were transferred to soil. We  
263 planted 5 seedlings per pot, grew to the stage with 8 rosette leaves, and sprayed with  
264 10 μM paraquat and sprayed again 3 days later. Photos and survival rate were  
265 recorded 10 days after the first spray.

266 **3-D model of At PQT11 structure**

267 The 3-D structure model of CYP86A4 was produced by Phyre2 and paraquat  
268 was docked into the structure model. Residues within the distance of 4 Å around  
269 paraquat are colored in red. Conservative residues likely responsible for the binding  
270 of paraquat are labeled and chosen as mutation sites.

271 **Site-directed mutagenesis of *AtPQT11***

272 Specific primers for site-directed mutagenesis were designed, for changing  
273 309Gly to Ala, 461Cys to Ala, 463Gly to Ala as listed in Table S1. pET28-CYP86A4  
274 or pCB2004-CYP86A4 were set as template and the PCR procedure was set for 20  
275 cycles. After the PCR products were recycled, 1 μl DpnI was added to digest these  
276 products. Then transferred these products to DH5α and extracted plasmids from  
277 overnight culture.

278 **Paraquat resistance assay in *E. coli***

279 We used Rosetta or BL21 as host, transferred the constructed pET28-P450 and  
280 the three plasmids with point mutation: pET28-P450A (Gly309Ala), pET28-P450B  
281 (Cys461Ala) and pET28-P450C (Gly463Ala) into the host bacteria, and empty vector  
282 pET28a as control. Single colonies grown on the plate were picked and cultured

283 overnight. Then the overnight culture was diluted into fresh LB medium with a  
284 starting OD<sub>600</sub> value of 0.1, and paraquat was added to make its final concentration of  
285 1 mM. Another set of culture with 0 mM paraquat was used as control. The OD<sub>600</sub>  
286 value of the culture was monitored at regular intervals for 36 hours. Each culture was  
287 triplicated and the growth curves were obtained. When tested on solid LB plate with 1  
288 mM paraquat, the overnight liquid bacteria culture was inoculated on the plate with 0  
289 or 1 mM paraquat and incubated overnight at 37°C.

### 290 **Bacterial expression of AtPQT11**

291 The CDS of *AtPQT11* was ligated to the vector pET28a by T4 ligase. The  
292 constructed plasmid was transformed into Rosetta strain with kanamycin selection. A  
293 clone was picked from medium and was added with liquid LB, when the OD<sub>600</sub> of  
294 medium reached 0.6, IPTG was added with a final concentration of 0.3 mM. The  
295 culture was shaken in 16°C with the speed of 120 rpm for 12-16 h. The culture was  
296 centrifuged for 10 min at 4500 rpm to harvest bacteria, then the bacterial pellet was  
297 resuspended with protein isolation buffer (20 mM Tris-Cl pH7.5, 0.2 M NaCl, 5%  
298 glycerin, 1 mM EDTA, 1 mM PMSF) + 1% Dodecyl-beta-D-maltoside (m/v), and  
299 ultrasonicated to break bacterial cell walls. The cell lysate was rotated at 4°C for 2h  
300 and then centrifuged at 45000 rpm for 30 min. The supernatant was collected for  
301 AtPQT11 protein purification using Ni-IDA-sefinose resin kit.

### 302 ***In vitro* enzyme assay of AtPQT11**

303 The reaction mixtures contained 0.1-10 µM paraquat as substrate, 50-100 µg  
304 AtPQT11/ CYP86A4 protein, 1 mM NADPH as electron donor, 25 mM phosphate  
305 buffer (pH7.0) in a total volume of 50 µl. The reaction was initiated by adding  
306 NADPH. The reaction mixtures without NADPH or AtPQT11/CYP86A4 were set as  
307 controls. The mixtures were incubated for 30 min at 27°C and terminated by adding  
308 50 µl acetonitrile. To determine the enzyme kinetic properties, the reaction was  
309 spectrophotometrically monitored at 340 nm for NADPH consumption. To identify  
310 the reaction product, the mixtures was centrifuged at 14000g for 20 min, and the

311 supernatant was analyzed by HPLC-MS/MS as described below.

### 312 **HPLC-MS/MS**

313 HPLC-MS/MS analysis was performed using Agilent Q-TOF-LC/MS 6545  
314 device (Agilent Technologies, Palo Alto, CA, USA) . A XBridge BEH HILIC 2.5 $\mu$ m  
315 Column (2.1\*100 mm) from Waters was used for chromatographic separation. The  
316 mobile phase was a mixture of solvent A (10 mM ammonium acetate added with 0.1%  
317 V/V formic acid) and solvent B (10 mM ammonium acetate dissolved in 95%  
318 acetonitrile) and was delivered at a flow rate of 0.3 mL/min. The column temperature  
319 was set at 40°C and the injection volume was 2  $\mu$ l. The sample was followed the  
320 gradient: 90% B (0 min), 10% B (3 min), 1% B (5 min), 90% B (5 min), with a total  
321 run time of 12 min.

322 Mass acquisition was performed in the positive ionization mode at a  
323 fragmentation voltage of 175 V. The following parameters were used: drying gas flow,  
324 8 L/min; temperature, 325 °C; sheath gas flow, 11 L/min; temperature, 350 °C;  
325 nebulizer pressure, 45 psi; and capillary voltage, 3500 V. The collision energy was set  
326 at 15–40 V, and the mass range was recorded from m/z 50–1700. The acquired MS  
327 and MS/MS data files were analyzed using Agilent MassHunter Qualitative Analysis  
328 B.07.00.

### 329 **Toxicity assay of N-demethyl paraquat**

330 Seeds of different genotypes were washed and treated at 4°C in dark condition  
331 for 2 days, then plated on MS medium with 2  $\mu$ M N-demethyl paraquat, 2  $\mu$ M  
332 bipyridine, 2  $\mu$ M paraquat, respectively. MS medium was used as mock. Germination  
333 and survival was recorded after 1 week.

### 334 **Statistical analyses**

335 Statistical significance was evaluated at the 0.05 probability level using Student's  
336 t-test.

### 337 **Supplemental information**

338 Figure S1. Paraquat resistance phenotype of *pqt11D* and confirmation of

339 *AtPQT11* expression in *pqt11*, *pqt11D*, and overexpression lines.

340 Fig. S2. 3-D model of AtPQT11 structure.

341 Table S1. Primers used in this study.

### 342 **Acknowledgements**

343 This work was supported by grants from the National Natural Science Foundation  
344 of China (grant no. 31770273). We thank ABRC for providing Arabidopsis mutant  
345 seeds.

### 346 **Author's Contributions**

347 CBX and YJH designed the experiments. YJH performed the major experiments.  
348 YPH isolated *pqt11D* and identified the T-DNA insertion site. JQX, WTH, AMM,  
349 XQQ, YXC, participated in experiments and data analyses. ZPF, YFC, YiPH, LPG  
350 contributed to LC-MS/MS analyses. YJH wrote the manuscript. CBX and LPG  
351 revised the manuscript and supervised the project.

### 352 **Conflict Interests**

353 The authors declare no conflict of interest.

354

355

---

## 356 References

357

- 358 1 Baldwin, B., Clarke, C. & Wilson, I. Paraquat in chloroplasts. *Biochimica et Biophysica Acta*  
359 (*BBA*)-*Bioenergetics* **162**, 614-617 (1968).
- 360 2 Farrington, J., Ebert, M., Land, E. & Fletcher, K. Pulse radiolysis studies of the reaction of  
361 paraquat radical with oxygen. Implication for the mode of action of bipuridyl herbicides.  
362 *Biochimica et Biophysica Acta* **314**, 372-381 (1973).
- 363 3 Lewthwaite, S. & Triggs, C. Identification of paraquatresistant *Solanum nigrum* and *S*  
364 *americanum* biotypes. *New Zealand Plant Protection* **62**, 349-355 (2009).
- 365 4 Jóri, B. *et al.* Role of transporters in paraquat resistance of horseweed *Conyza canadensis* (L.)  
366 Cronq. *Pesticide Biochemistry and Physiology* **88**, 57-65, doi:10.1016/j.pestbp.2006.08.013  
367 (2007).
- 368 5 Lasat, M. M., DiTomaso, J. M., Hart, J. J. & Kochian, L. V. Evidence for vacuolar sequestration  
369 of paraquat in roots of a paraquat-resistant *Hordeum glaucum* biotype. *Physiologia*  
370 *Plantarum* **99**, 255-262 (1997).
- 371 6 Hawkes, T. R. Mechanisms of resistance to paraquat in plants. *Pest Manag Sci* **70**, 1316-1323,  
372 doi:10.1002/ps.3699 (2014).
- 373 7 Shaaltiel, Y. & Gressel, J. Kinetic analysis of resistance to paraquat in *Conyza*: evidence that  
374 paraquat transiently inhibits leaf chloroplast reactions in resistant plants. *Plant physiology* **85**,  
375 869-871 (1987).
- 376 8 Ye, B. & Gressel, J. Transient, oxidant-induced antioxidant transcript and enzyme levels  
377 correlate with greater oxidant-resistance in paraquat-resistant *Conyza bonariensis*. *Planta*  
378 **211**, 50-61 (2000).
- 379 9 Tsuji, K., Hosokawa, M., Morita, S., Miura, R. & Tominaga, T. Resistance to paraquat in *M. azu*  
380 *pumilus*. *Weed Research* **53**, 176-182 (2013).
- 381 10 Chen, R. *et al.* The Arabidopsis PARAQUAT RESISTANT2 gene encodes an S-nitrosoglutathione  
382 reductase that is a key regulator of cell death. *Cell Research* **19**, 1377-1387,  
383 doi:10.1038/cr.2009.117 (2009).
- 384 11 Kurepa, J., Smalle, J., Va, M., Montagu, N. & Inzé, D. Oxidative stress tolerance and longevity  
385 in Arabidopsis: the late-flowering mutant *gigantea* is tolerant to paraquat. *The Plant Journal*  
386 **14**, 759-764 (1998).
- 387 12 Fujita, M. *et al.* Natural variation in a polyamine transporter determines paraquat tolerance  
388 in Arabidopsis. *Proceedings of the national academy of sciences of the united states of*  
389 *america* **109**, 6343-6347, doi:10.1073/pnas.1121406109 (2012).
- 390 13 Li, J. *et al.* Paraquat Resistant1, a Golgi-localized putative transporter protein, is involved in  
391 intracellular transport of paraquat. *Plant Physiology* **162**, 470-483,  
392 doi:10.1104/pp.113.213892 (2013).
- 393 14 Soar, C., Preston, C., Karotam, J. & Powles, S. Polyamines can inhibit paraquat toxicity and  
394 translocation in the broadleaf weed *Arctotheca calendula*. *Pesticide Biochemistry and*  
395 *Physiology* **80**, 94-105 (2004).

- 
- 396 15 Xi, J., Xu, P. & Xiang, C. B. Loss of AtPDR11, a plasma membrane-localized ABC transporter,  
397 confers paraquat tolerance in *Arabidopsis thaliana*. *Plant Journal* **69**, 782-791,  
398 doi:10.1111/j.1365-313X.2011.04830.x (2012).
- 399 16 Luo, C. *et al.* PARAQUAT TOLERANCE3 Is an E3 Ligase That Switches off Activated Oxidative  
400 Response by Targeting Histone-Modifying PROTEIN METHYLTRANSFERASE4b. *PLOS Genetics*  
401 **12** (2016).
- 402 17 Sipari, N., Lihavainen, J., Shapiguzov, A., Kangasjärvi, J. & Keinänen, M. Primary Metabolite  
403 Responses to Oxidative Stress in Early-Senescing and Paraquat Resistant *Arabidopsis thaliana*  
404 *rcd1* (Radical-Induced Cell Death1). *Frontiers in plant science* **11**, 194 (2020).
- 405 18 Schuler, M. A. & Werck-Reichhart, D. Functional genomics of P450s. *Annual review of plant*  
406 *biology* **54**, 629-667 (2003).
- 407 19 Kreuz, K., Tommasini, R. & Martinoia, E. Old enzymes for a new job (herbicide detoxification  
408 in plants). *Plant physiology* **111**, 349 (1996).
- 409 20 Didierjean, L. *et al.* Engineering herbicide metabolism in tobacco and *Arabidopsis* with  
410 CYP76B1, a cytochrome P450 enzyme from Jerusalem artichoke. *Plant Physiology* **130**,  
411 179-189 (2002).
- 412 21 Yamada, T., Kambara, Y., Imaishi, H. & Ohkawa, H. Molecular Cloning of Novel Cytochrome  
413 P450 Species Induced by Chemical Treatments in Cultured Tobacco Cells. *Pesticide*  
414 *Biochemistry and Physiology* **68**, 11-25 (2000).
- 415 22 Mansuy, D. The great diversity of reactions catalyzed by cytochromes P450. *Comp Biochem*  
416 *Physiol C Pharmacol Toxicol Endocrinol* **121**, 5-14, doi:10.1016/s0742-8413(98)10026-9  
417 (1998).
- 418 23 Xiang, W., Wang, X. & Ren, T. Expression of a wheat cytochrome P450 monooxygenase cDNA  
419 in yeast catalyzes the metabolism of sulfonylurea herbicides. *Pesticide biochemistry and*  
420 *physiology* **85**, 1-6 (2006).
- 421 24 Siminszky, B., Corbin, F. T., Ward, E., Fleischmann, T. J. & Dewey, R. E. Expression of a soybean  
422 cytochrome P450 monooxygenase cDNA in yeast and tobacco enhances the metabolism of  
423 phenylurea herbicides. *Proceedings of the National Academy of Sciences of the United States*  
424 *of America* **96**, 1750-1755 (1999).
- 425 25 Baucom, R. S. The remarkable repeated evolution of herbicide resistance. *Am J Bot* **103**,  
426 181-183, doi:10.3732/ajb.1500510 (2016).
- 427 26 Lei, Z. *et al.* High-throughput Binary Vectors for Plant Gene Function Analysis. *Journal of*  
428 *Integrative Plant Biology* **49**, 556-567 (2007).
- 429 27 Clough, S. J. & Bent, A. F. Floral dip: A simplified method for *Agrobacterium*-mediated  
430 transformation of *Arabidopsis thaliana*. *Plant Journal* **16**, 735-743 (1998).

431

432

433

434

435

436

437

438

439



---

## 440 **Figure Legends**

441

442 **Figure 1. *AtPQT11* confers paraquat resistance in *Arabidopsis* and *E. coli* when**  
443 **overexpressed.**

444 (A) The seeds of wild type (WT), *AtPQT11* overexpression lines (OX1-4, OX3-1),  
445 and *pqt11* were germinated on MS medium with 0 or 2  $\mu$ M paraquat (PQ) for 1 week  
446 before survival was recorded. 100 seeds were used for each genotype. 3 replicates  
447 were performed for each treatment. Bar = 1 cm.

448 (B) Survival % in germination as in (A). Values are mean  $\pm$ SD (n=3). The low case  
449 letters indicate significant differences ( $P < 0.05$ ).

450 (C) Phenotypes of wild type (WT), *AtPQT11* overexpression lines (OX1-4, OX3-1),  
451 and *pqt11* grown in the soil. When plants grew to 8-rosette-leaf stage, they were  
452 sprayed with 0 (control) or 10  $\mu$ M paraquat and sprayed again 3 days later. Photos and  
453 survival % were recorded 10 days after the first spray. 40 plants were used for each  
454 genotype. 3 replicates were performed for each treatment.

455 (D) Survival % as in (C). Values are mean  $\pm$ SD (n=3). The low case letters indicate  
456 significant differences ( $P < 0.05$ ).

457 (E) Bacterial growth curves. Plasmids pET28a-*AtPQT11* (pET28a-P450) with  
458 different changed residue: pET28-P450A (Gly309Ala), pET28-P450B (Cys461Ala)  
459 and pET28-P450C (Gly463Ala) were transferred into Rosetta, and cultured in LB  
460 medium with 0 or 1 mM paraquat. The growth of the cultures with initial OD<sub>600</sub>  
461 adjusted to 0.1 was monitored for 36 hours. 3 replicates were performed for each  
462 treatment. Values are mean  $\pm$ SD (n=3).

463 (F) Bacterial growth on solid agar plates. Bacterial strains as in (E) were inoculated on  
464 solid LB medium with 0 or 1 mM paraquat and incubated overnight at 37°C.

465

466 **Figure 2. *In vitro* kinetic parameters of *AtPQT11***

467 (A) *AtPQT11*-dependent reaction. The enzyme assay was carried out as described in  
468 Materials and Methods with 2 controls, no *AtPQT11* (CYP684A) and inactivated  
469 *AtPQT11*. NADPH consumption was only observed in the reaction containing

470 AtPQT11. Values are mean  $\pm$ SD (n=3).

471 (B) Michaelis-Menton plot for paraquat. 2 mM NADPH was added to ensure it is in  
472 excess in the reaction while varying the concentration of paraquat. Values are mean  
473  $\pm$ SD (n=3).

474 (C) Michaelis-Menton plot for NADPH. 2 mM Paraquat was added to ensure it is in  
475 excess in the reaction while varying the concentration of NADPH. Values are mean  
476  $\pm$ SD (n=3).

477 (D) The enzyme kinetics parameters.  $V_{max}$  and  $K_m$  were obtained from (B) and (C),  $K_m$   
478 and  $V_{max}$  values were estimated by using non-linear regression analysis.

479

480 **Figure 3. Identification of the reaction product by LC-MS/MS.**

481 (A-D) The reaction was carried out with paraquat or  $^2\text{H}$ -paraquat as substrate as  
482 described in Materials and Methods for 30 min. The reaction supernatant was  
483 subjected to LC-MS/MS analysis by scanning product at M/Z 171 or 179. (A) and (B)  
484 are the reaction for 0 or 30 min, (C) and (D) are the reaction for 30 min but without  
485 NADPH or P450 enzyme.

486 (E-G) The MS/MS spectrum of substrate and product. (E) The MS/MS spectrum of  
487 paraquat when the reaction was just started. (F) The MS/MS spectrum of product  
488 when the reaction was completed (30 min). (G) The MS/MS spectrum of paraquat  
489 standard and N-demethyl paraquat standard. MS/MS spectrum of the product closely  
490 matches with that of N-demethyl paraquat (M/Z 171).

491

492 **Figure 4. N-demethyl paraquat is nontoxic to Arabidopsis.**

493 (A) Germination assay. The seeds of wild type (WT), *AtPQT11* overexpression lines  
494 (OX1-4, OX3-1), and *pqt11* were germinated on MS medium with 0 (Mock), 2  $\mu\text{M}$   
495 paraquat (PQ), 2  $\mu\text{M}$  N-demethyl paraquat (N-methyl PQ), or 2  $\mu\text{M}$  bipyridine,  
496 respectively for 1 week before survival was recorded. 100 seeds were used for each  
497 genotype. 3 replicates were performed for each treatment. Bar = 1 cm.

498 (B) Survival % in germination as in (A). Values are mean  $\pm$ SD (n=3). The low case  
499 letters indicate significant differences ( $P < 0.05$ ).

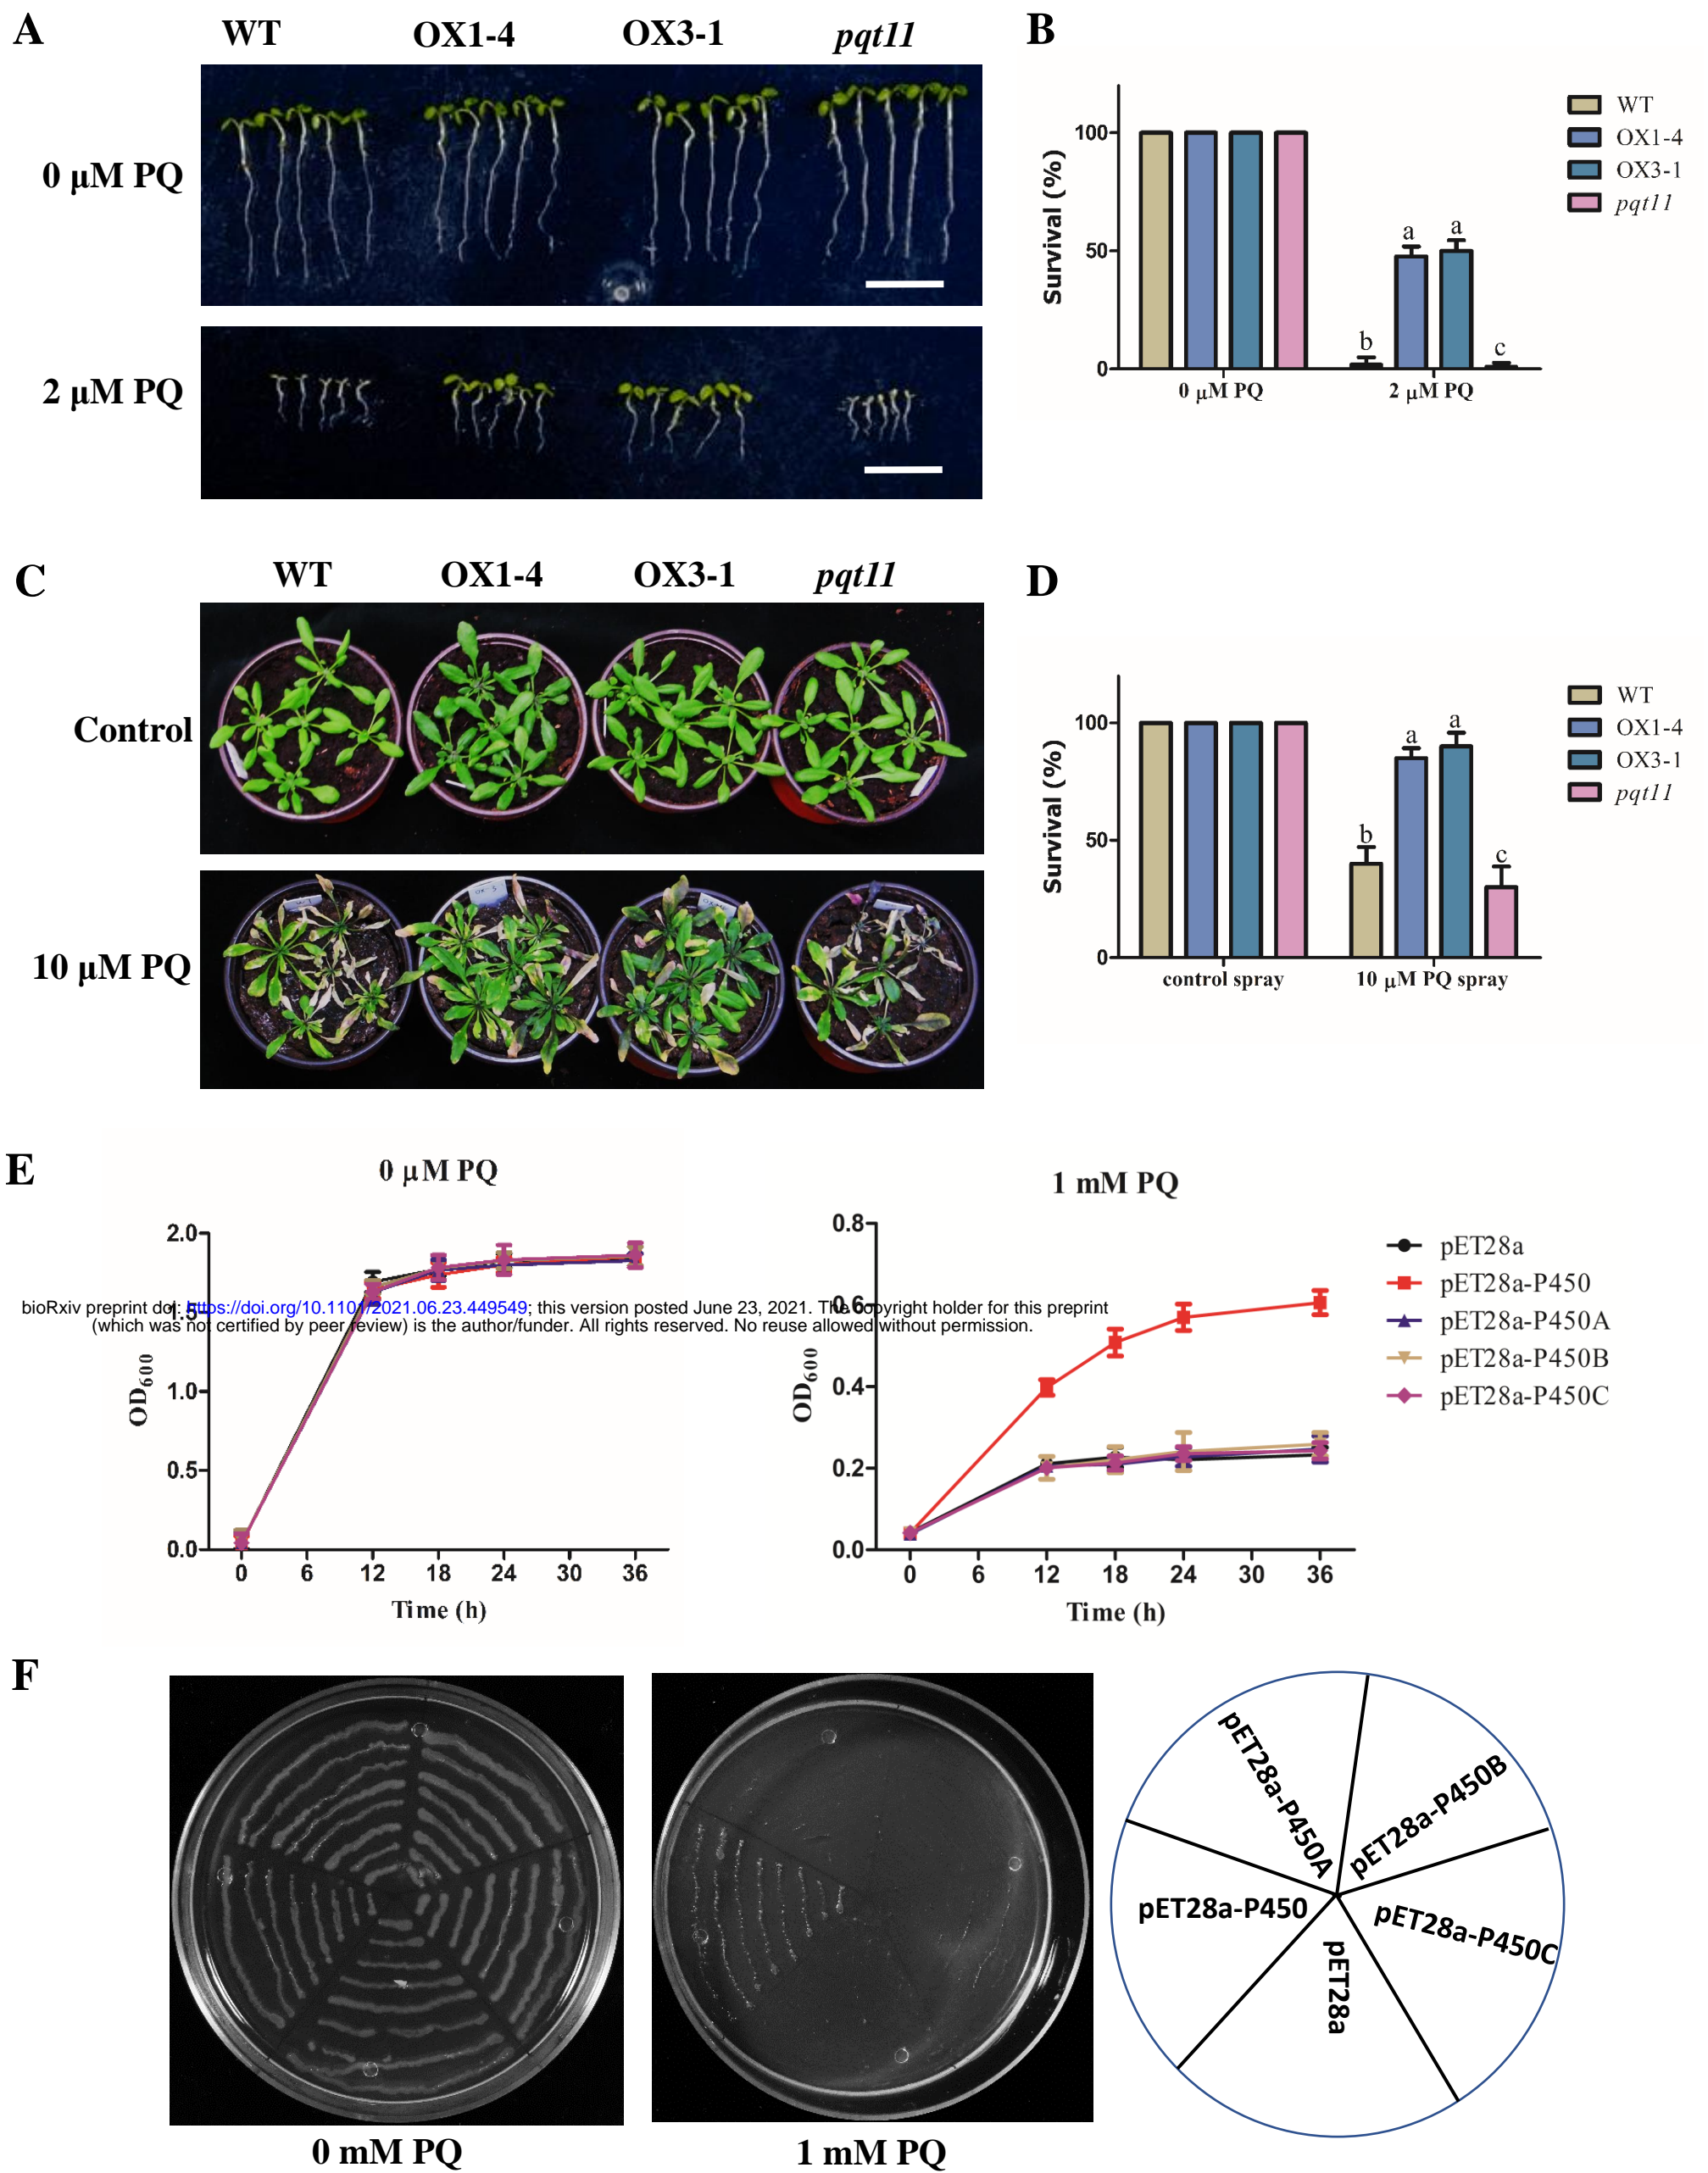

**Figure 1. *AtPQT11* confers paraquat resistance in *Arabidopsis* and *E. coli* when overexpressed.**

(A) The seeds of wild type (WT), *AtPQT11* overexpression lines (OX1-4, OX3-1), and *pqt11* were germinated on MS medium with 0 or 2  $\mu\text{M}$  paraquat (PQ) for 1 week before survival was recorded. 100 seeds were used for each genotype. 3 replicates were performed for each treatment. Bar = 1 cm.

(B) Survival % in germination as in (A). Values are mean  $\pm$ SD (n=3). The low case letters indicate significant differences ( $P < 0.05$ ).

(C) Phenotypes of wild type (WT), *AtPQT11* overexpression lines (OX1-4, OX3-1), and *pqt11* grown in the soil. When plants grew to 8-rosette-leaf stage, they were sprayed with 0 (control) or 10  $\mu\text{M}$  paraquat and sprayed again 3 days later. Photos and survival % were recorded 10 days after the first spray. 40 plants were used for each genotype. 3 replicates were performed for each treatment.

(D) Survival % as in (C). Values are mean  $\pm$ SD (n=3). The low case letters indicate significant differences ( $P < 0.05$ ).

(E) Bacterial growth curves. Plasmids pET28a-*AtPQT11* (pET28a-P450) with different changed residue (pET28a-P450A, pET28a-P450B, pET28a-P450C) were transferred into Rosetta, and cultured in LB medium with 0 or 1 mM paraquat. The growth of the cultures with initial  $\text{OD}_{600}$  adjusted to 0.1 was monitored for 36 hours. 3 replicates were performed for each treatment. Values are mean  $\pm$ SD (n=3).

(F) Bacterial growth on solid agar plates. Bacterial strains as in (E) were inoculated on solid LB medium with 0 or 1 mM paraquat and incubated overnight at 37°C.

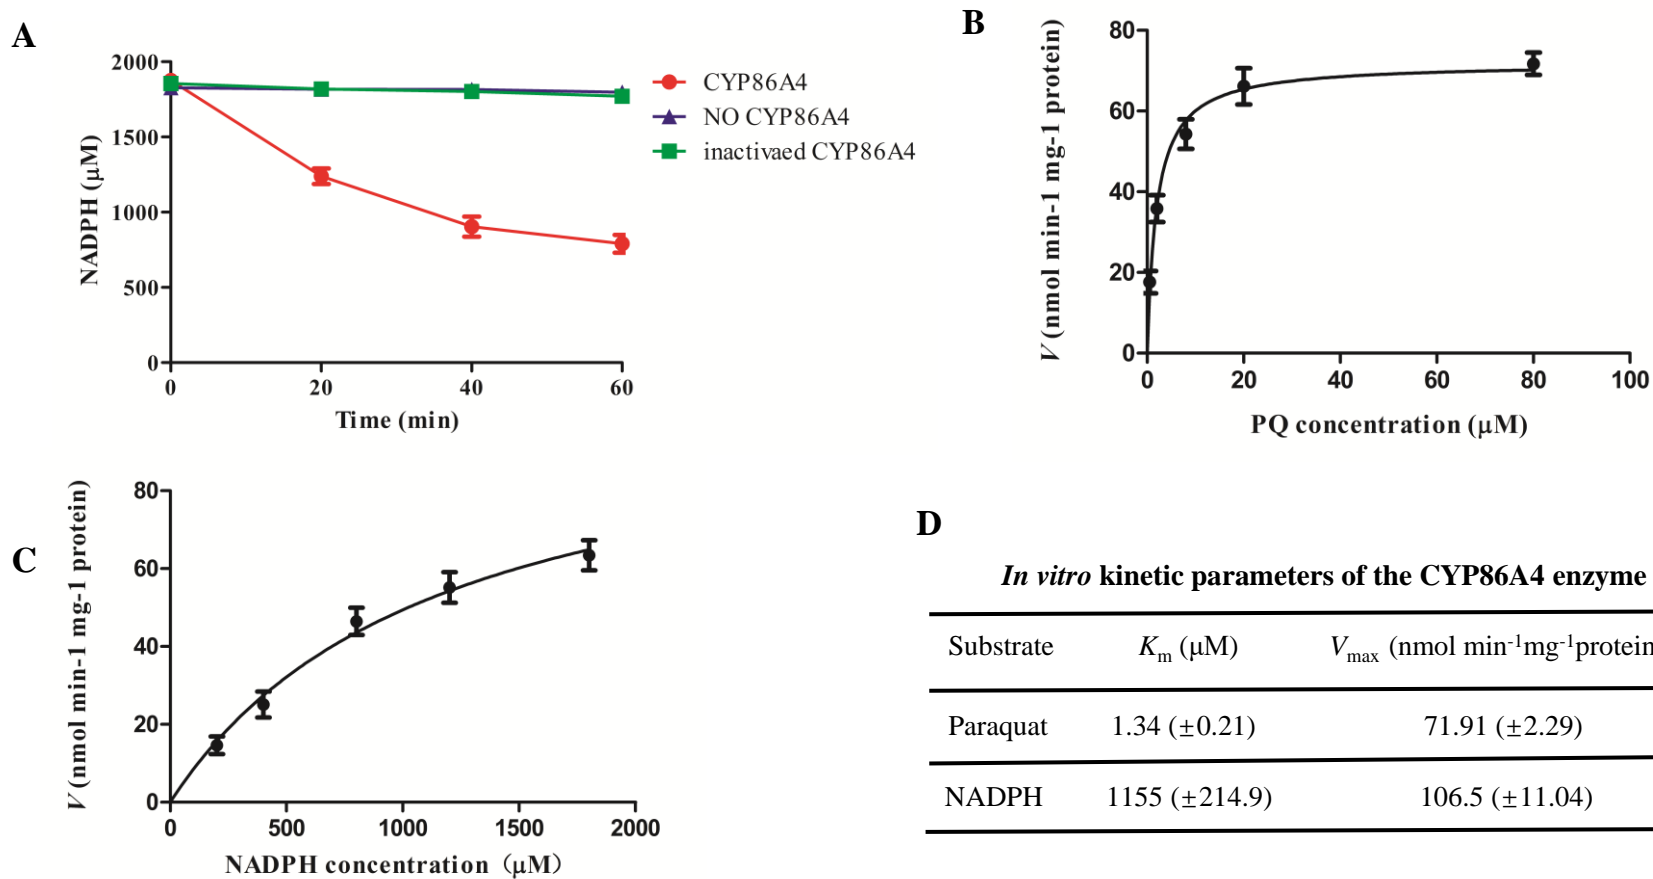

**Figure 2. *In vitro* kinetic parameters of AtPQT11**

(A) AtPQT11-dependent reaction. The enzyme assay was carried out as described in Materials and Methods with 2 controls, no AtPQT11 (CYP684A) and inactivated AtPQT11. NADPH consumption was only observed in the reaction containing AtPQT11. Values are mean  $\pm$ SD (n=3).

(B) Michaelis-Menton plot for paraquat. 2 mM NADPH was added to ensure it is in excess in the reaction while varying the concentration of paraquat. Values are mean  $\pm$ SD (n=3).

(C) Michaelis-Menton plot for NADPH. 2 mM Paraquat was added to ensure it is in excess in the reaction while varying the concentration of NADPH. Values are mean  $\pm$ SD (n=3).

(D) The enzyme kinetics parameters.  $V_{max}$  and  $K_m$  were obtained from (B) and (C),  $K_m$  and  $V_{max}$  values were estimated by using non-linear regression analysis.



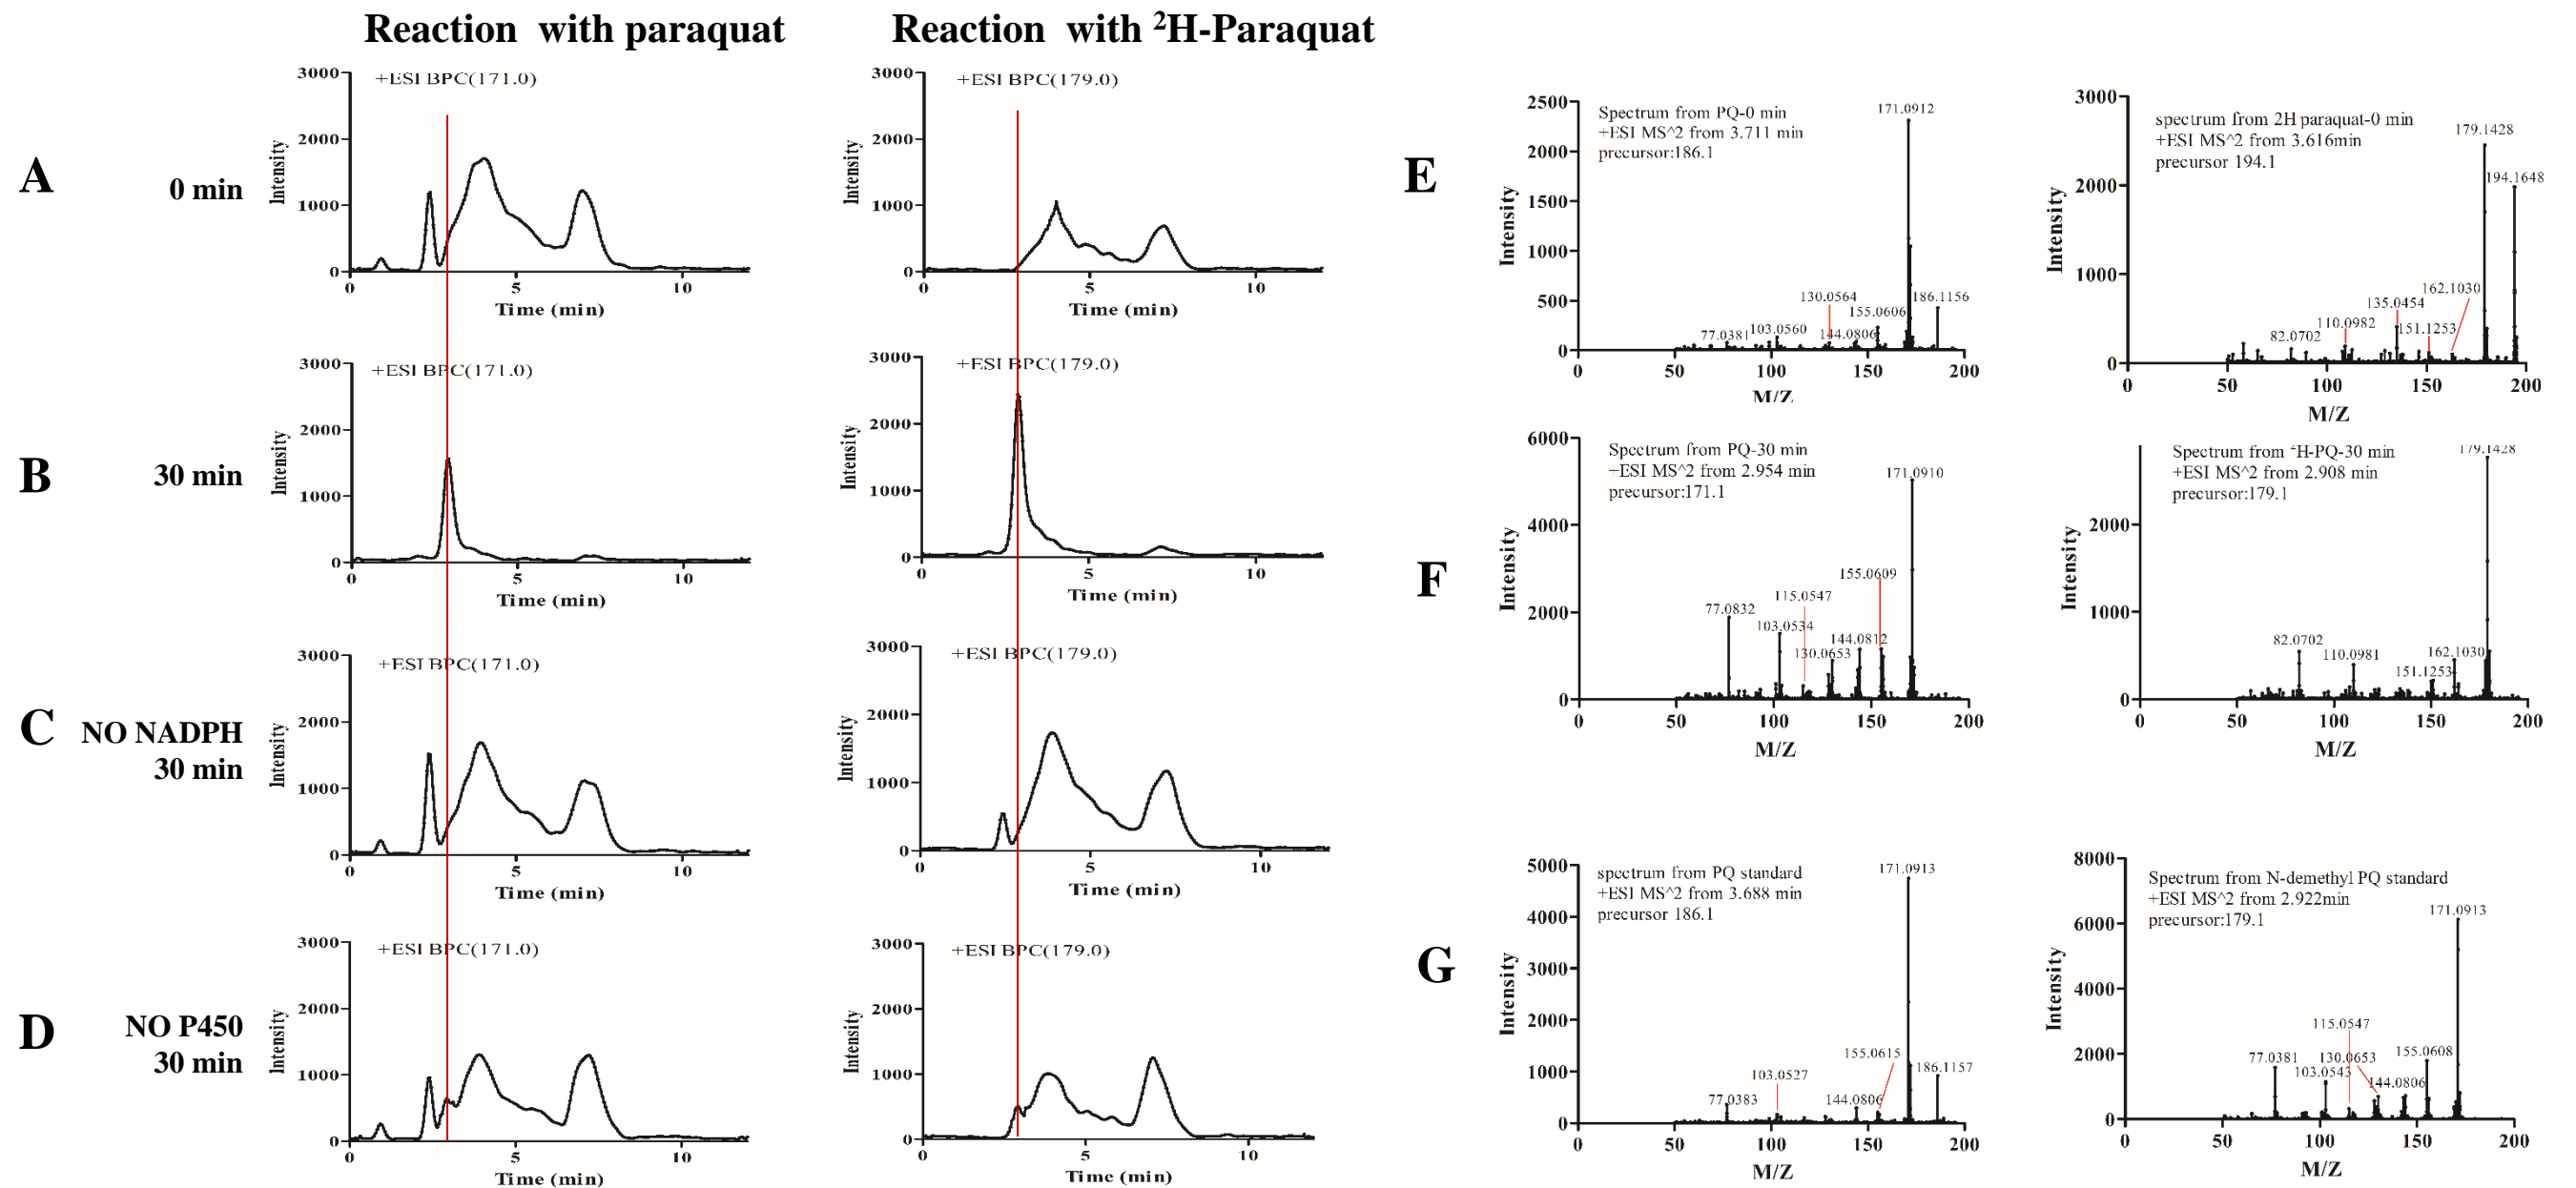

**Figure 3. Identification of the reaction product by LC-MS/MS.**

(A-D) The reaction was carried out with paraquat or  $^2\text{H}$ -paraquat as substrate as described in Materials and Methods for 30 min. The reaction supernatant was subjected to LC-MS/MS analysis by scanning product at M/Z 171 or 179. (A) and (B) are the reaction for 0 or 30 min, (C) and (D) are the reaction for 30 min but without NADPH or P450 enzyme.

(E-G) The MS/MS spectrum of substrate and product. (E) The MS/MS spectrum of paraquat when the reaction was just started. (F) The MS/MS spectrum of product when the reaction was completed (30 min). (G) The MS/MS spectrum of paraquat standard and N-demethyl paraquat standard. MS/MS spectrum of the product closely matches with that of N-demethyl paraquat (M/Z 171).

**A****WT****OX1-4****OX3-1*****pqt11***

bioRxiv preprint doi: <https://doi.org/10.1101/2021.06.23.449549>; this version posted June 23, 2021. The copyright holder for this preprint (which was not certified by peer review) is the author/funder. All rights reserved. No reuse allowed without permission.

**Mock****PQ****N-demethyl  
PQ****bipyridine**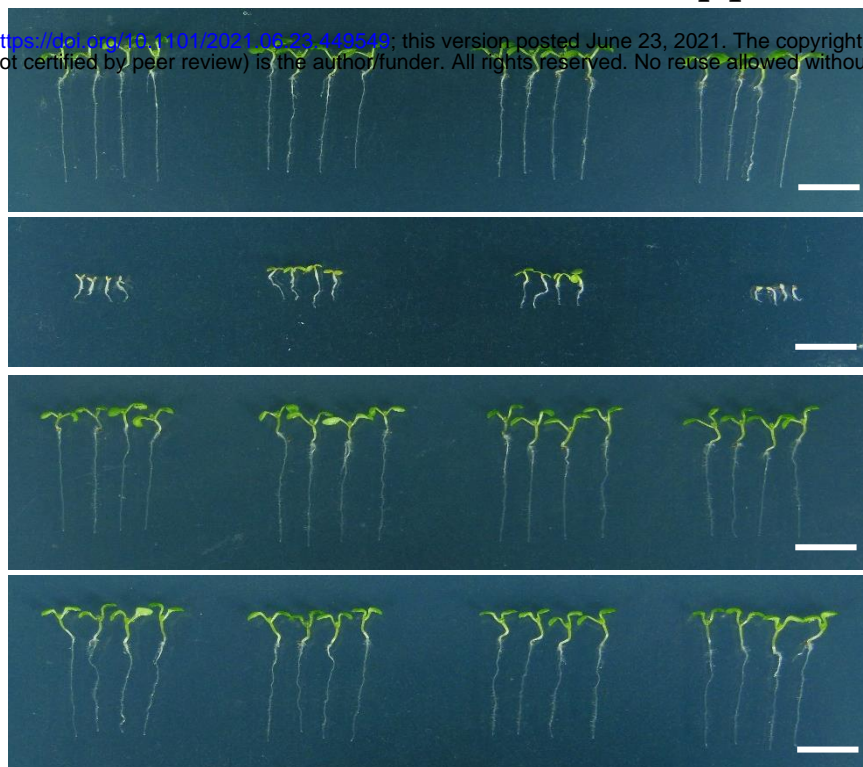**B**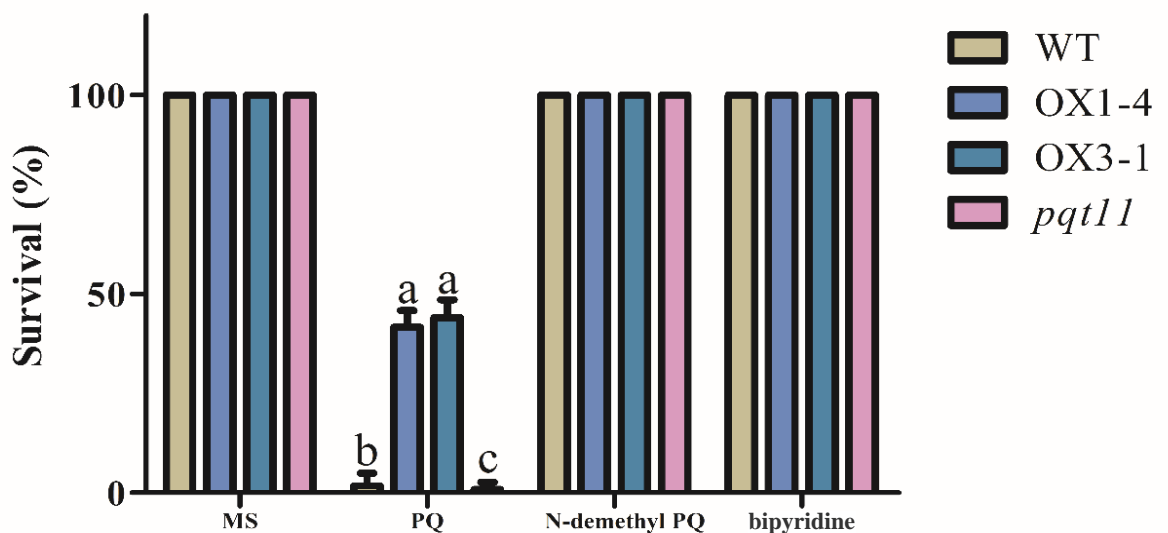

**Figure 4. N-demethyl paraquat is nontoxic to Arabidopsis.**

(A) Germination assay. The seeds of wild type (WT), *AtPQT11* overexpression lines (OX1-4, OX3-1), and *pqt11* were germinated on MS medium with 0 (Mock), 2  $\mu$ M paraquat (PQ), 2  $\mu$ M N-demethyl paraquat (N-methyl PQ), or 2  $\mu$ M bipyridine, respectively for 1 week before survival was recorded. 100 seeds were used for each genotype. 3 replicates were performed for each treatment. Bar = 1 cm.

(B) Survival % in germination as in (A). Values are mean  $\pm$ SD (n=3). The low case letters indicate significant differences ( $P < 0.05$ ).
